# Supplementary material
Source: PubMed Central journal article supplement (PMC2947170)
Supplement: tpc.109.071316_1.pdf [file tpc.109.071316_1.pdf]

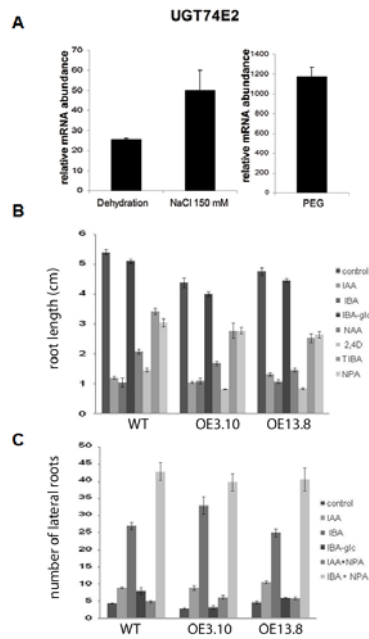

**Supplemental Figure 1.** UGT74E2 stress induction and auxin effects on root development.

**(A)** Real time RT-PCR transcript analysis of *UGT74E2* in seedlings exposed to 150 mM NaCl (3 h), 50 mM PEG (5 h), and dehydration stress (10 h). Error bars are SE (n=3).

**(B)** Comparative graph of root length of 4-day-old wild-type and transgenic lines grown on MS with 0.5 % sucrose agar plates and transferred to the same media containing 0.5  $\mu$ M IAA, 5  $\mu$ M IBA, 5  $\mu$ M IBA-Glc, 100 nM NAA, 50 nM 2,4-D, 5  $\mu$ M triiodobenzoic acid, or 5  $\mu$ M NPA for 8 days.

**(C)** Lateral roots counted 8 days after transfer of 4-day-old seedlings to medium supplemented with either auxins (0.5  $\mu$ M IAA, 5  $\mu$ M IBA, 5 $\mu$ M IBA-Glc) or the same auxins in combination with 5  $\mu$ M NPA. Error bars are SE of four independent experiments (n=25).

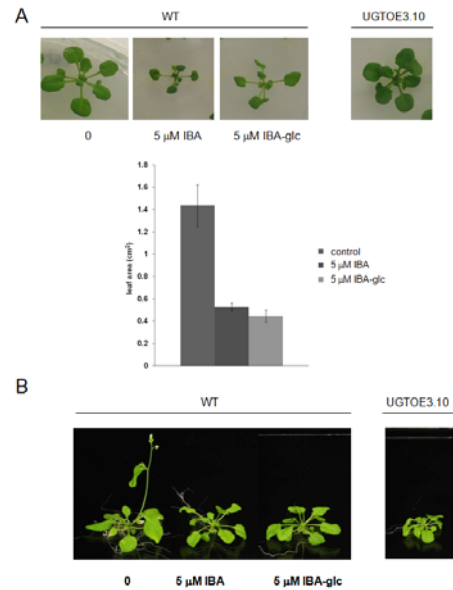

**Supplemental Figure 2.** Auxin effects on plant morphology.

(A) One-month-old wild-type seedlings grown on MS 0.5% sucrose plates supplemented with the indicated concentration of IAA, IBA, or IBA-Glc. Leaf area was calculated with the ImageJ program (<http://rsb.info.nih.gov/ij/>) and expressed as cm<sup>2</sup>. Error bars are SE of three independent experiments (n=10).

(B) Effect of auxin on flowering time in 48-day-old plants grown on MS 0.5% sucrose on magenta boxes supplemented with auxin. Late-flowering transition phenotype of the UGT74E2OE plants compared to wild-type plants.

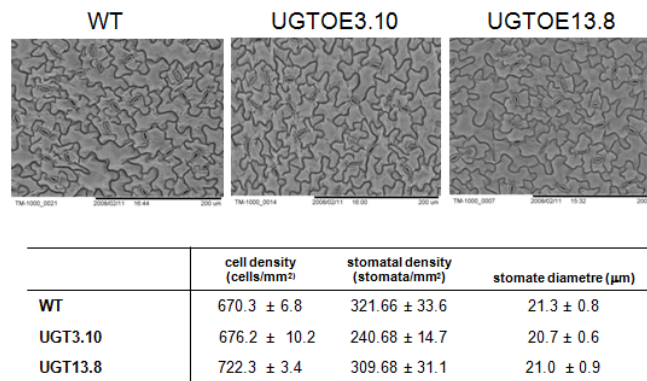

**Supplemental Figure 3.** Analysis of epidermal cells in UGT74EOE plants.

Epidermal cells of the 3rd leaf of 21-day-old plants grown under short-day conditions determined by scanning electron microscopy (Hitachi tabletop microscope IM-1000). Bars = 200 μm. Data are means ± SE (n =6).

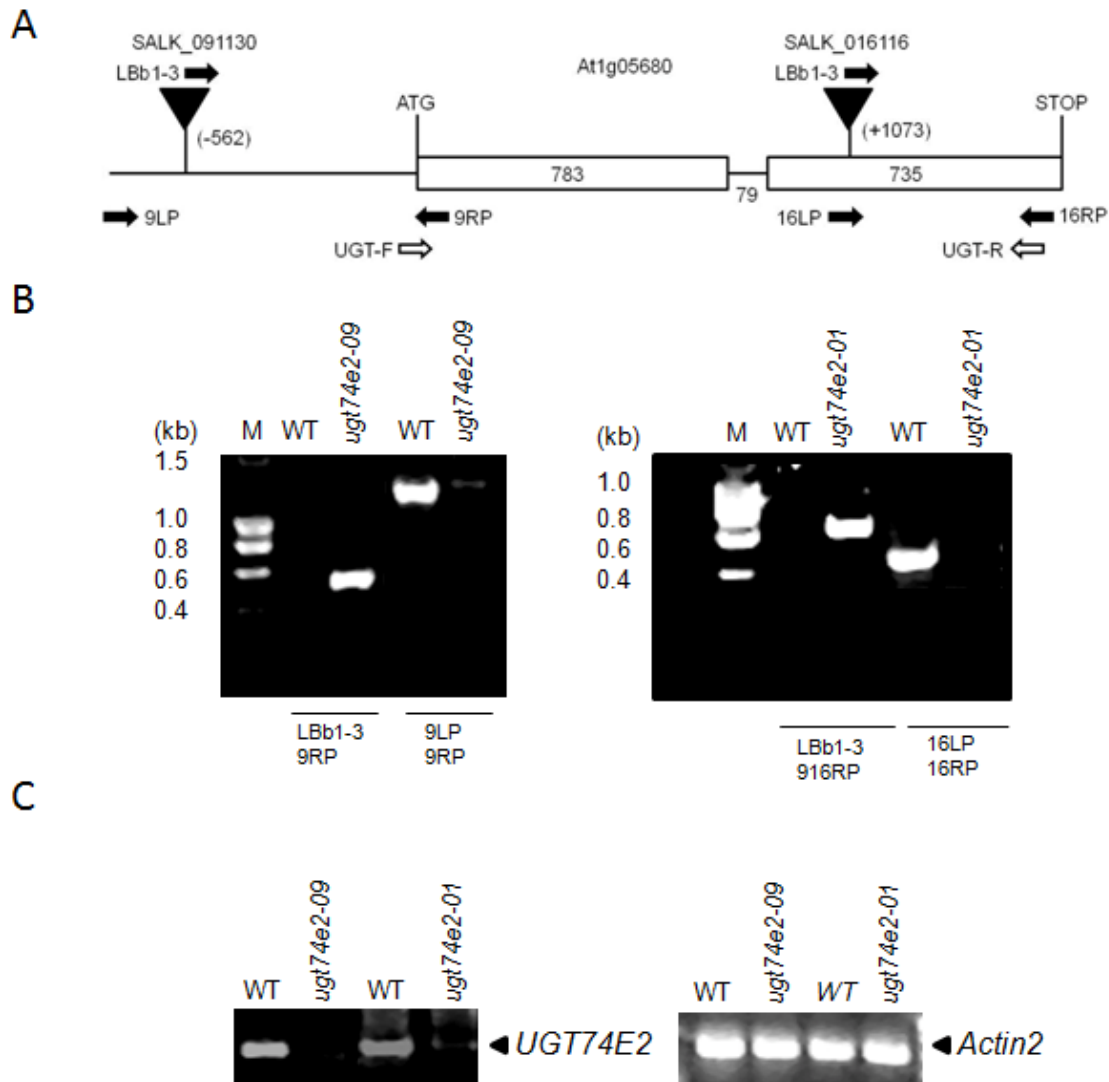

**Supplemental Figure 4.** Identification of homozygous insertion mutants at the *UGT74E2* locus.

(A) Schematic diagram of the *UGT74E2* gene (*At1g05680*) from *Arabidopsis* and localization of the T-DNA insertions in *ugt74e2-09* (*SALK\_091130*) and *ugt74e2-01* (*SALK\_016116*) alleles. Numbering begins at the ATG translation start codon (+1). Exons are represented by white boxes and introns by lines. Exon and intron lengths are indicated in base pairs inside the box or below each line, respectively. The position of the T-DNA insertion is indicated in a bracket with respect to the ATG start codon. Black arrows show the positions and orientations of the primers used for genotyping and white arrows for primers used for PCR expression analysis.

(B) and (C) Validation of the mutant lines by PCR analysis (B) or by qRT-PCR analysis (C) of *UGT74E2* transcripts on genomic DNA. The *Actin2* gene (*At3g18780*) served as a control. M corresponds to molecular mass markers. PCR primers are indicated above each lane.

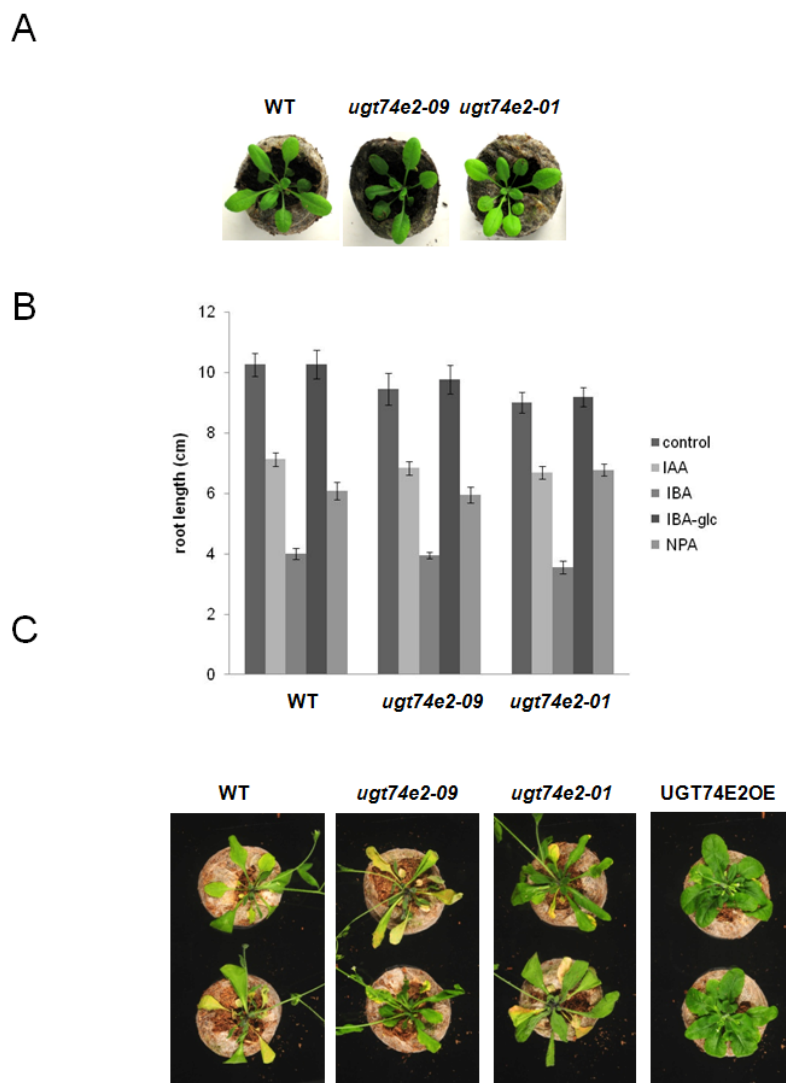

**Supplemental Figure 5.** Phenotype and auxin response of UGT74E2 knockout mutants.

(A) Rosette shapes of 1-month-old wild-type, UGT74E2OE, and *ugt74e2* knockout mutant plants grown under long-day regime.

(B) Comparative graph of root length of 4-day-old wild-type and knockout mutants transferred to media containing 0.5  $\mu$ M IAA, 5  $\mu$ M IBA, 5  $\mu$ M IBA-Glc, or 5  $\mu$ M NPA for 10 days. Error bars are SE of two independent experiments (n=25).

(C) Plants of wild-type, *ugt74e2* mutants, and UGT74E2OE lines grown under a controlled watering regime for 3.5 weeks and deprived from further watering for 17 days.

**Supplemental Table 1.** Phenotypic comparison of wild-type and UGT74E2OE plants. Wild-type plants and transformants grown in soil for 51 days in the growth chamber under short-day conditions. Gas exchange in 1-month-old leaves at 500  $\mu\text{mol m}^{-2} \text{s}^{-1}$  and chlorophyll *a* fluorescence were measured as described (Methods). Data are means  $\pm$ SE (n =3). Statistically significant differences are indicated in bold ( $P < 0.005$ ).

|                                                                                         | Wild type                        | UGTOE3.10                        | UGTOE13.8                       |
|-----------------------------------------------------------------------------------------|----------------------------------|----------------------------------|---------------------------------|
| Chlorophyll <i>a+b</i> ( $\mu\text{g cm}^{-1}$ )                                        | <b>12.5 <math>\pm</math> 0.2</b> | <b>17.6 <math>\pm</math> 0.3</b> | <b>15 <math>\pm</math> 0.2</b>  |
| Height (cm)                                                                             | <b>18.1 <math>\pm</math> 0.6</b> | <b>9.2 <math>\pm</math> 0.05</b> | <b>9.0 <math>\pm</math> 0.6</b> |
| Net CO <sub>2</sub> assimilation ( $\mu\text{mol CO}_2 \text{ m}^{-2} \text{ s}^{-1}$ ) | 12.8 $\pm$ 0.6                   | 12.3 $\pm$ 0.8                   | 13.5 $\pm$ 0.4                  |
| Stomatal conductance ( $\text{mol H}_2\text{O m}^{-2} \text{ s}^{-1}$ )                 | 0.23 $\pm$ 0.01                  | 0.22 $\pm$ 0.02                  | 0.26 $\pm$ 0.02                 |
| Rosette fresh weight (g)                                                                | 14.9 $\pm$ 0.8                   | 13.8 $\pm$ 1.5                   | 13.4 $\pm$ 0.7                  |
| Root length on MS without sucrose after 10 days (n=5)                                   | <b>3.45 <math>\pm</math> 0.1</b> | <b>2.2 <math>\pm</math> 0.2</b>  | <b>1.6 <math>\pm</math> 0.1</b> |

**Supplemental Table 2.** Differential genes in UGT74E2OE plants as determined by full-genome microarray analysis. Probe sets with a *P* value <0.05 and 1.5-fold change were retained.

| Probe set   | AGI code  | Description                                             | Fold change | <i>P</i> -value |
|-------------|-----------|---------------------------------------------------------|-------------|-----------------|
| 263231_at   | AT1G05680 | UGT74E2 IBA-glycosyltransferase                         | 178.31      | 9.64E-12        |
| 256940_at   | AT3G30720 | Expressed protein                                       | 5.98        | 6.70E-06        |
| 251428_at   | AT3G60140 | Dark-inducible DIN2 glycosyl hydrolase                  | 2.08        | 7.47E-03        |
| 245306_at   | AT4G14690 | ELIP2 early light-induced protein (chlorophyll binding) | 1.99        | 6.13E-03        |
| 252629_at   | AT3G44970 | Cytochrome P450 CYP708A4                                | 1.97        | 3.36E-04        |
| 254828_at   | AT4G12550 | AIR1 auxin-induced in root cultures                     | 1.84        | 4.71E-02        |
| 250142_at   | AT5G14650 | Polygalacturonase/pectinase                             | 1.75        | 8.95E-03        |
| 261768_at   | AT1G15550 | Gibberellin 3- $\beta$ -dioxygenase GA4                 | 1.72        | 2.00E-02        |
| 263689_at   | AT1G26820 | Ribonuclease RNS3                                       | 1.71        | 4.71E-02        |
| 251743_at   | AT3G55890 | Yippee family protein, zinc-binding protein             | 1.65        | 3.63E-02        |
| 263549_at   | AT2G21650 | Myb family transcription factor                         | 1.64        | 5.10E-03        |
| 255517_at   | AT4G02290 | Glycosyl hydrolase                                      | 1.55        | 1.92E-02        |
| 253024_at   | AT4G38080 | Hydroxyproline-rich glycoprotein                        | 1.54        | 3.43E-02        |
| 245982_at   | AT5G13170 | Nodulin MtN3 family protein                             | 0.66        | 3.43E-02        |
| 259640_at   | AT1G52400 | Glycosyl hydrolase BGL1                                 | 0.65        | 1.92E-02        |
| 265053_at   | AT1G52000 | Jacalin lectin myrosinase binding                       | 0.64        | 1.38E-02        |
| 250828_at   | AT5G05250 | Mitochondrial expressed protein                         | 0.64        | 1.92E-02        |
| 259080_at   | AT3G04910 | WNK1 protein kinase                                     | 0.62        | 4.57E-03        |
| 262661_s_at | AT1G14230 | Nucleoside phosphatase                                  | 0.62        | 1.92E-02        |
| 255795_at   | AT2G33380 | RD20 EF-hand protein induced by ABA, salt and drought   | 0.62        | 1.80E-02        |
| 250012_x_at | AT5G18060 | Auxin-inducible SAUR (Small Auxin Up RNAs)              | 0.61        | 5.46E-03        |
| 259417_at   | AT1G02340 | HFR1 bHLH protein involved in phytochrome signaling     | 0.57        | 1.68E-03        |
| 245422_at   | AT4G17470 | Palmitoyl protein thioesterase                          | 0.54        | 1.85E-03        |
| 248270_at   | AT5G53450 | ORG1 OBP3-responsive SA-induced protein kinase          | 0.53        | 4.60E-03        |
| 266141_at   | AT2G02120 | Plant defensin-fusion protein, putative PDF2.1          | 0.51        | 3.43E-02        |
| 250942_at   | AT5G03350 | Legume lectin family protein                            | 0.49        | 2.34E-02        |
| 261684_at   | AT1G47400 | Expressed protein                                       | 0.48        | 1.92E-02        |
| 251677_at   | AT3G56980 | ORG3 OBP3-responsive SA-induced bHLH protein            | 0.46        | 6.13E-03        |
| 245692_at   | AT5G04150 | Mitochondrion/nucleus bHLH protein                      | 0.43        | 1.28E-03        |
| 256766_at   | AT3G22231 | PCC1 pathogen and circadian controlled                  | 0.24        | 1.11E-03        |
| 251772_at   | AT3G55920 | Peptidyl-prolyl cis-trans isomerase cyclophilin         | 0.09        | 9.62E-09        |

**Supplemental Table 3.** Auxin effect on photosynthesis. Wild-type and transgenic plants grown on MS 0.5% sucrose agar plates were transferred to new plates supplemented with polyethylene glycol (PEG), mannitol (M), or both PEG and auxin: M+IBA, M+IBA-Glc, and PEG+IAA. Seedlings were also germinated on plates supplemented with IBA, IBA-Glc, or IAA and, after 2 weeks, transferred to new PEG or M plates supplemented with IBA (M+IBA-IBA treated), IBA-Glc (M+IBA-Glc-IBA-Glc treated) or IAA (PEG+IAA-IAA treated). Chlorophyll *a* fluorescence was measured after 8 days of stress as described (Methods). Data are means  $\pm$  SE of two independent experiments (n=25). Statistically significant differences ( $\alpha=0.05$ ) were obtained by weighted ANOVA (see Methods).

| Lines and treatments                | ETRmax                         |
|-------------------------------------|--------------------------------|
| Wild type control                   | 35.0 $\pm$ 1.1                 |
| UGTOE13.8 control                   | 33.2 $\pm$ 1.2                 |
| UGTOE3.10 control                   | 36.1 $\pm$ 0.5                 |
| Wild-type M                         | 24.4 $\pm$ 0.7 <sup>*1*2</sup> |
| UGTOE13.8 M                         | 30.0 $\pm$ 1.0 <sup>*1</sup>   |
| UGTOE3.10 M                         | 32.6 $\pm$ 1.0 <sup>*1</sup>   |
| Wild type M+IBA                     | 12.2 $\pm$ 0.5 <sup>*3*4</sup> |
| Wild type M+IBA-IBA treated         | 15.9 $\pm$ 0.2 <sup>*3*4</sup> |
| Wild type M+IBA-Glc                 | 20.8 $\pm$ 1.1 <sup>*3</sup>   |
| Wild type M+IBA-Glc-IBA-Glc treated | 18.5 $\pm$ 0.7 <sup>*3*4</sup> |
| Wild type PEG                       | 26.3 $\pm$ 1.3 <sup>*1*2</sup> |
| UGTOE13.8 PEG                       | 34.5 $\pm$ 0.8 <sup>*1</sup>   |
| UGTOE3.10 PEG                       | 32.7 $\pm$ 0.4 <sup>*1</sup>   |
| Wild type PEG+IAA                   | 22.1 $\pm$ 1.0 <sup>*3</sup>   |
| Wild type PEG+IAA-IAA treated       | 32.7 $\pm$ 1.1                 |

<sup>\*1</sup>*P* <0.01 between UGTOE and wild type; <sup>\*2</sup>*P* <0.01 between PEG or M and control growth conditions; <sup>\*3</sup>*P* <0.01 between auxin treatment and UGTOE lines under PEG or M treatment; <sup>\*4</sup>*P* <0.01 between auxin treatment and wild-type plants under PEG or M treatments. ETRmax: maximal electron transfer rate.
